# Supplementary material for: &lt;sup&gt;10&lt;/sup&gt;Be-based exploration of the timing of deglaciation in two selected areas of southern Norway
Source: Copernicus journal article supplement (doi:10.5194/egqsj-68-165-2019), 2019-07-30
Supplement: Supplementary file 1 [file egqsj-68-165-2019-supplement.zip]

Archive with 4 entries (4 files):
- Supplement.docx
- figS04.tif
- egqsj-68-165-2019-supplement-title-page.pdf
- figS05.tif
