# Supplementary material for: &lt;sup&gt;10&lt;/sup&gt;Be-based exploration of the timing of deglaciation in two selected areas of southern Norway
Source: Copernicus journal article supplement (doi:10.5194/egqsj-68-165-2019), 2019-07-30
Supplement: Supplementary file 1 [file egqsj-68-165-2019-supplement.zip › egqsj-68-165-2019-supplement-title-page.pdf]

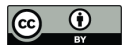

## *Supplement of*

# **$^{10}\text{Be}$ -based exploration of the timing of deglaciation in two selected areas of southern Norway**

**Philipp Marr et al.**

*Correspondence to:* Philipp Marr ([marr@uni-bonn.de](mailto:marr@uni-bonn.de))

- [egqsj-68-165-2019-supplement-title-page.pdf](#)
- [Supplement.docx](#)
- [figS04.tif](#)
- [figS05.tif](#)

The copyright of individual parts of the supplement might differ from the CC BY 4.0 License.
