# Supplementary material for: &lt;sup&gt;10&lt;/sup&gt;Be-based exploration of the timing of deglaciation in two selected areas of southern Norway
Source: Copernicus journal article supplement (doi:10.5194/egqsj-68-165-2019), 2019-07-30
Supplement: Supplementary file 1 [file egqsj-68-165-2019-supplement.zip › Supplement.docx]

**Table S2: Effect on the application of glacio-isostatic uplift on Dalsnibba samples.**

|  | No uplift correction | | Uplift correction 30 mb | |
| --- | --- | --- | --- | --- |
| Sample ID | Age (yr)a | External uncertainty (yr) | Age (yr)a | External uncertainty (yr) |
| DanBed1 | 12400 ± 500 | 1100 | 12700 ± 500 | 1100 |
| DanBed2 | 10700 ± 800 | 1200 | 11000 ± 800 | 1200 |
| DanBed3 | 13000 ± 500 | 1200 | 13300 ± 600 | 1200 |
| DanBed5 | 10100 ± 400 | 900 | 10300 ± 500 | 900 |
| DanBo | 16100 ± 600 | 1400 | 16500 ± 600 | 1500 |
| a Regional spallation induced production rate ‘Western Norway’ (normalized to sea-level high-latitude) (Goehring et al., 2012a, 2012b). Ages calculated using the online exposure age calculator version 3 formerly known as the CRONUS-Earth online exposure age calculator (Balco et al., 2008; Balco, 2017; http://hess.ess.washington.edu/, last access: 30.April 2019), standard atmosphere and pressure ‘std’, a rock density of 2.6 g cm-3. The time-dependent LSD scaling model of Lifton et al. (2014) was used. Erosion was calculated with 1 mm kyr-1. b Information about estimation of the total glacio-isostatic uplift see in section 5.1. | | | | |

**Table S3: Effect of different glacio-isostatic uplift scenarios on Blåhø samples.**

| Sample ID | No uplift correction | | Uplift correction 100m | | Uplift correction 150m | |
| --- | --- | --- | --- | --- | --- | --- |
|  | Age (yr) | External  uncertainty (yr) | Age (yr) | External  uncertainty (yr) | Age (yr) | External  uncertainty (yr) |
| BlaBed | 42600 ± 1500 | 3800 | 46400 ± 1700 | 4200 | 48500 ± 1800 | 4400 |
| BlaBo | 19300 ± 800 | 1700 | 20900 ± 800 | 1900 | 21800 ± 900 | 2000 |
| BL05-2* | 10700 ± 1000 | 1300 | 11700 ± 1000 | 1400 | 12200 ± 1100 | 1500 |
| BL05-1* | 9100 2200 | 2300 | 9900 ± 2400 | 2500 | 10300 ± 2500 | 2600 |
| BL05-3* | 11300 ± 800 | 1200 | 12300 ± 800 | 1300 | 12800 ± 900 | 1300 |
| BL05-5* | 13200 ± 1100 | 1500 | 14400 ± 1200 | 1600 | 15000 ±1200 | 1700 |
| BL05-4* | 24400 ± 1500 | 2500 | 26600 ± 1600 | 2700 | 27800 ± 1700 | 2800 |
| BL05-7* | 22500 ± 1400 | 2300 | 24500 ± 1500 | 2500 | 25500 ± 1600 | 2600 |
| BL05-6* | 20000 ± 1500 | 2200 | 21800 ± 1600 | 2400 | 22700 ± 1700 | 2500 |
| Regional spallation induced production rate ‘Western Norway’ (normalized to sea-level high-latitude) (Goehring et al., 2012a, 2012b). Ages calculated using the online exposure age calculator version 3 formerly known as the CRONUS-Earth online exposure age calculator (Balco et al., 2008; Balco, 2017; <http://hess.ess.washington.edu/>, last access: 30. April 2019), standard atmosphere and pressure ‘std’, a rock density of 2.6 g cm-1. The time-dependent LSD scaling model of Lifton et al. (2014) was used. Erosion was calculated with 1 mm kyr-1.  * Recalculated samples first presented by Goehring et al. (2008). | | | | | | |

**Table S4: Recalculated 10Be ages from Blåhø by Goehring et al. (2008).**

| Sample ID | Latitude (°) | Longitude (°) | Altitude (m a.s.l.) | Sample thicknessa (cm) | Topo-graphic shielding | 10Be conc. corrected (105 at/g) | External uncertainty (yr) | Exposure age (yr) |
| --- | --- | --- | --- | --- | --- | --- | --- | --- |
| BL05-2 | 61.89784 | 913.809 | 1086 | 6.25 | 1 | 1.25 ± 0.11 | 3804 | 10675 ± 950 |
| BL05-1 | 61.89590 | 914.320 | 1142 | 3.7 | 1 | 1.14 ± 0.27 | 1711 | 9072 2170 |
| BL05-3 | 61.90444 | 917.181 | 1176 | 1.25 | 1 | 1.48 ± 0.10 | 1270 | 11260 ± 770 |
| BL05-5 | 61.90289 | 916.580 | 1182 | 1.25 | 1 | 1.74 ± 0.14 | 2264 | 13202 ± 1077 |
| BL05-4 | 61.90355 | 920.972 | 1302 | 2.45 | 1 | 3.49 ± 0.21 | 1176 | 24419 1508 |
| BL05-7 | 61.90295 | 925.299 | 1481 | 1.25 | 1 | 3.77 ± 0.23 | 1500 | 22459 ± 1403 |
| BL05-6 | 61.89768 | 928.446 | 1617 | 1.25 | 1 | 3.77 ± 0.27 | 2469 | 20042 ± 1466 |
| All ages are calculated using version 3 of the calculator code found at https://hess.ess.washington.edu/ (Balco et al., 2008; Balco, 2017, last access: 30. April 2019). The regional ‘Western Norway’ 10Be production rate (Goehring et al., 2012a, 2012b) is applied with standard atmosphere and pressure ‘std’ and a rock density of 2.6 g cm-3. The time-dependent LSD scaling model of Lifton et al. (2014) was used and assumes erosion of 1 mm kyr-1. No uplift is considered in the exposure ages.  a No sample thickness was reported in Goehring et al. (2008), corrections for sample thickness were made assuming an exponential decrease in production rate with assuming an attenuation length of 160 g cm-2 and sample density of 2.6 g cm-3. We used the CosmoCalc calculator to estimate the sample thickness. The mean of all possible values leading to the thickness correction of, e.g. 0.98 were used, assuming an attenuation length of 160 g cm-2 and sample density of 2.6 g cm-3 and are expressed in cm. | | | | | | | | |

**Figure S4: Altitude/age relationship of the 10Be results of Dalsnibba bedrock samples between 1476 and 1334 m a.s.l. and the valley bottom surface exposure age from Marr et al. (2019).**

**Figure S5: Images of the field area and sampling localities. a) Erratic boulder sample from Blåhø. b) Bedrock sample from Blåhø. c) Location where the glacially transported boulder was sampled from Dalsnibba. d) Typical bedrock sampling site on Dalsnibba.**
