# Supplementary figures and images for: &lt;sup&gt;10&lt;/sup&gt;Be-based exploration of the timing of deglaciation in two selected areas of southern Norway
Source: Copernicus journal article supplement (doi:10.5194/egqsj-68-165-2019), 2019-07-30

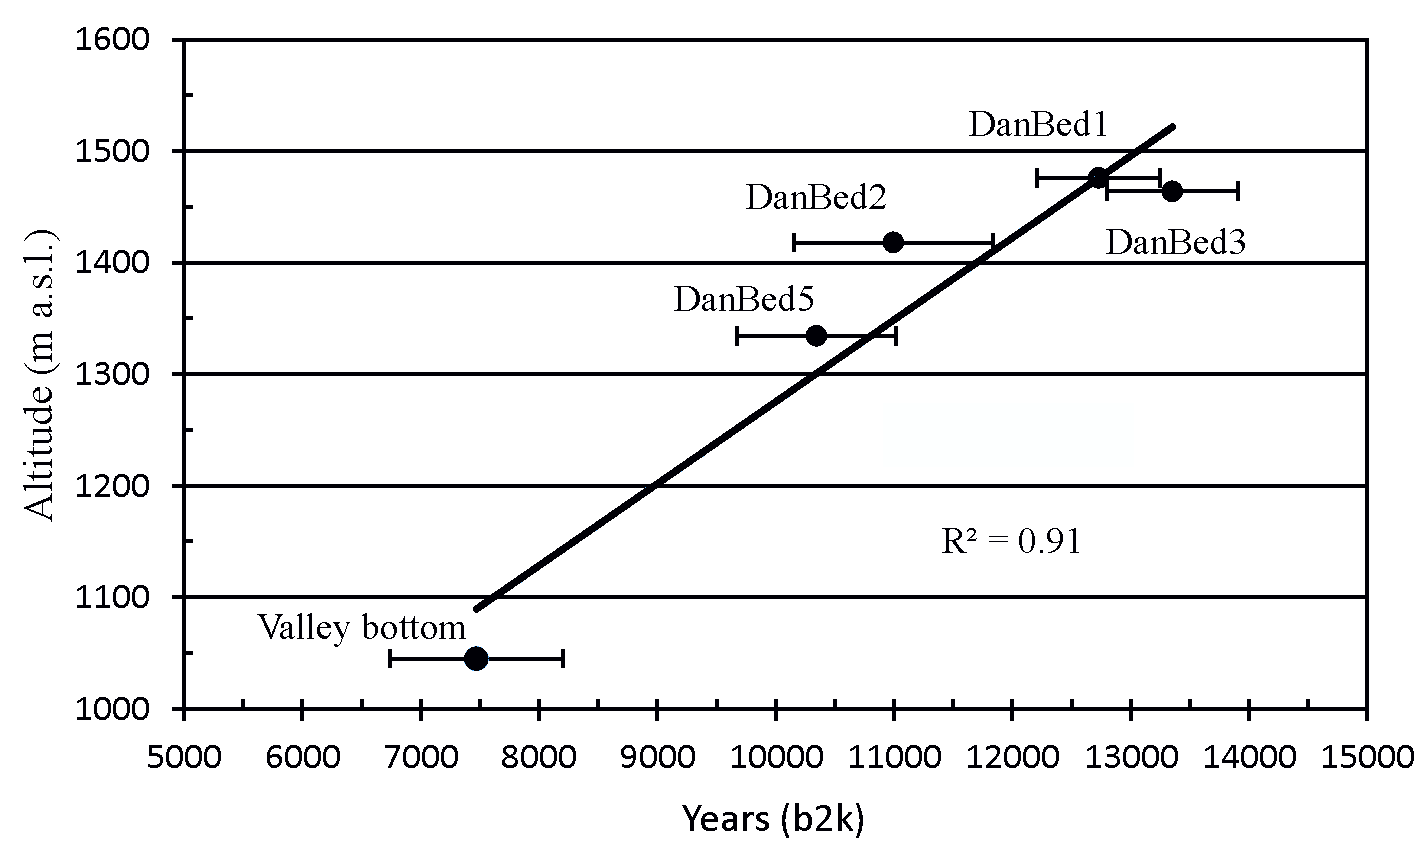

Supplement: Supplementary file 1 [file egqsj-68-165-2019-supplement.zip › figS04.tif]
